# Supplementary material for: Understanding of Final Year Medical, Pharmacy and Nursing Students in Pakistan towards Antibiotic Use, Antimicrobial Resistance and Stewardship: Findings and Implications
Source: MDPI journal article supplement (doi:10.3390/antibiotics12010135), 2023-01-10
Supplement: s1 [file s1]

## Supplementary Figures and Tables

Figure S1: Sources of information ( $n=1251$ )

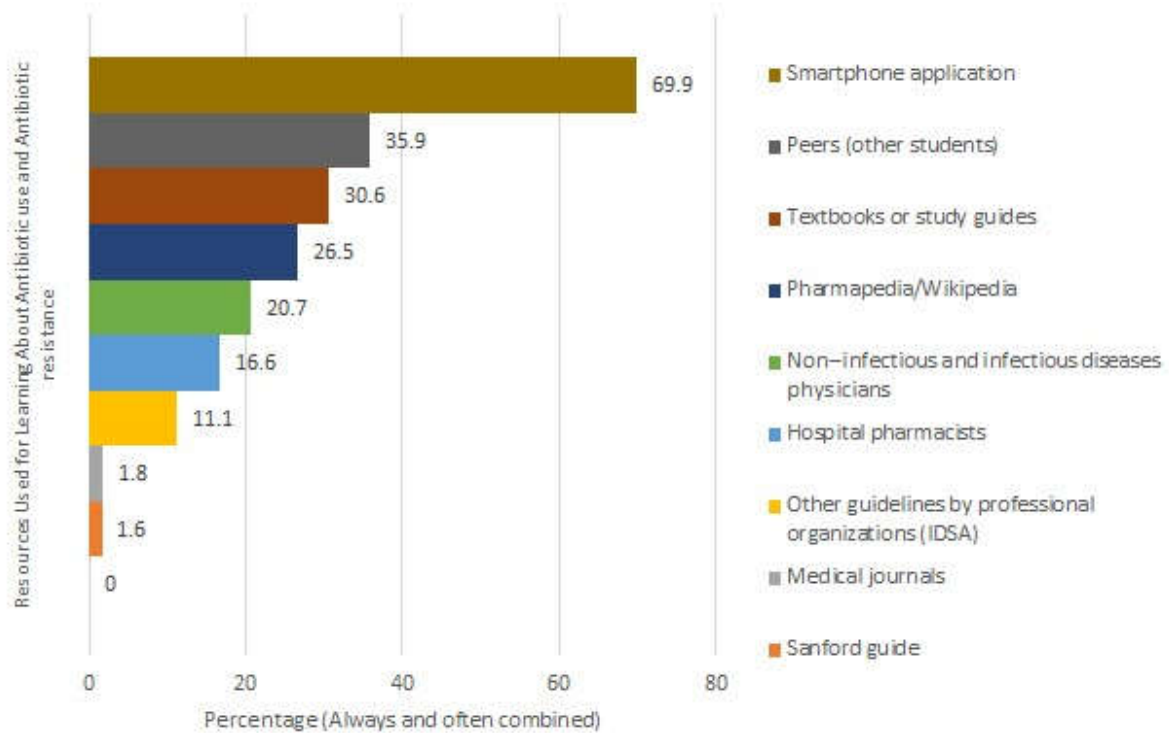

Table S1: Demographic characteristics of study participants ( $n=1251$ )

| Variables                              | Frequency ( $n$ ) | Percentage (%) |
|----------------------------------------|-------------------|----------------|
| <b>Sex</b>                             |                   |                |
| Female                                 | 916               | 73.2           |
| Male                                   | 335               | 26.8           |
| <b>Age (years)</b>                     |                   |                |
| <20                                    | 14                | 1.1            |
| 20-25                                  | 1105              | 88.3           |
| >25                                    | 132               | 10.6           |
| <b>Family income (PKR)</b>             |                   |                |
| <25000                                 | 32                | 2.6            |
| 25000-75000                            | 639               | 51.1           |
| >75000                                 | 579               | 46.3           |
| <b>Student type</b>                    |                   |                |
| Medical                                | 360               | 28.8           |
| Pharmacy                               | 471               | 37.6           |
| Nursing                                | 420               | 33.6           |
| <b>Institute type</b>                  |                   |                |
| Public                                 | 913               | 73.0           |
| Private                                | 338               | 27.0           |
| <b>Residence</b>                       |                   |                |
| Rural                                  | 752               | 60.1           |
| Urban                                  | 499               | 39.9           |
| <b>Parents profession</b>              |                   |                |
| Medical                                | 237               | 18.9           |
| Non-Medical                            | 1014              | 81.1           |
| <b>ASP Training</b>                    |                   |                |
| Yes                                    | 369               | 29.5           |
| No                                     | 882               | 70.5           |
| <b>Antibiotic use in last 6 months</b> |                   |                |
| Yes                                    | 431               | 34.5           |
| No                                     | 820               | 65.5           |

NB: ASP: Antimicrobial Stewardship, (PKR) = Pakistani Rupee

Table S2: Resources Used for Learning About Antibiotic use and Antibiotic resistance

| S. No | Questions                                         | Always (%) | Often (%)  | Sometimes (%) | Seldom (%)  | Never (%)   |
|-------|---------------------------------------------------|------------|------------|---------------|-------------|-------------|
| 1     | Textbooks or study guides                         | 42 (3.4)   | 340 (27.2) | 378 (30.2)    | 348 (27.8)  | 143 (11.4)  |
| 2     | Smartphone application                            | 227 (18.1) | 648 (51.8) | 314 (25.1)    | 62 (5.0)    | 0 (0.0)     |
| 3     | Hospital pharmacists                              | 2 (0.2)    | 205 (16.4) | 222 (17.7)    | 329 (26.3)  | 493 (39.4)  |
| 4     | Non-infectious and infectious diseases physicians | 18 (1.4)   | 241 (19.3) | 414 (33.1)    | 248 (19.8)  | 330 (26.4)  |
| 5     | Medical journals                                  | 0 (0.0)    | 22 (1.8)   | 105 (8.4)     | 402 (32.1)  | 722 (57.7)  |
| 6     | Peers (other students)                            | 33 (2.6)   | 416 (33.3) | 579 (46.3)    | 208 (16.6)  | 15 (1.2)    |
| 7     | Sanford guide                                     | 3 (0.2)    | 18 (1.4)   | 139 (11.1)    | 1091 (87.2) | 0 (0.0)     |
| 8     | Infectious Diseases Society of America guidelines | 0 (0.0)    | 0 (0.0)    | 4 (0.3)       | 94 (7.5)    | 1153 (92.2) |
| 9     | Other guidelines by professional organizations    | 2 (0.2)    | 136 (10.9) | 437 (34.9)    | 319 (25.5)  | 357 (28.5)  |
| 10    | Pharmapedia/Wikipedia                             | 45 (3.6)   | 287 (22.9) | 504 (40.3)    | 368 (29.4)  | 47 (3.8)    |

Table S3: Details of Medical, Pharmacy and Nursing Institutions

| Name of Institute                                                                                                                        | Type of institute | Sector of institute | Frequency (n) | Percentage (%) |
|------------------------------------------------------------------------------------------------------------------------------------------|-------------------|---------------------|---------------|----------------|
| Rehman College Of Nursing & Allied Health Sciences, Khanewal                                                                             | Nursing           | Private             | 73            | 5.8            |
| Rehman College Of Nursing & Allied Health Sciences, Mianwali                                                                             | Nursing           | Private             | 72            | 5.8            |
| Rehman College Of Nursing & Allied Health Sciences, Multan                                                                               | Nursing           | Private             | 60            | 4.8            |
| Rehman College Of Nursing & Allied Health Sciences, Vehari                                                                               | Nursing           | Private             | 46            | 3.7            |
| Bahawal Victoria Hospital, Bahawalpur                                                                                                    | Medical           | Public              | 60            | 4.8            |
| Faculty of Pharmacy, Bahauddin Zakariya University, Multan                                                                               | Pharmacy          | Public              | 49            | 3.9            |
| College of nursing, Bahawal Victoria Hospital, Bahawalpur                                                                                | Nursing           | Public              | 65            | 5.2            |
| Fatima Medical University, Faisalabad                                                                                                    | Medical           | Public              | 65            | 5.2            |
| Faculty of pharmacy, Islamia University, Bahawalpur                                                                                      | Pharmacy          | Public              | 64            | 5.1            |
| Institute of Pharmacy, Faculty of Pharmaceutical and Allied Health Sciences, Lahore College for Women University, Lahore 54000, Pakistan | Pharmacy          | Public              | 46            | 3.7            |
| Lady Willingdon Hospital School of Nursing, Lahore                                                                                       | Nursing           | Public              | 66            | 5.3            |
| School Of Nursing, Allied Hospital, Faisalabad                                                                                           | Nursing           | Public              | 38            | 3.0            |
| Nishtar Medical University, Multan                                                                                                       | Medical           | Public              | 39            | 3.1            |
| Punjab University, College of pharmacy, University of the Punjab, Lahore                                                                 | Pharmacy          | Public              | 115           | 9.2            |
| Department of Pharmacy, Quaid e Azam University, Islamabad.                                                                              | Pharmacy          | Public              | 48            | 3.8            |
| Rawalpindi Medical University, Rawalpindi                                                                                                | Medical           | Public              | 41            | 3.3            |
| Services Institute of Medical Sciences, Lahore                                                                                           | Medical           | Public              | 51            | 4.1            |
| Sharif Medical & Dental College, Lahore                                                                                                  | Medical           | private             | 26            | 2.1            |
| Shalimar medical and dental college, Lahore                                                                                              | Medical           | private             | 32            | 2.6            |
| Sahiwal Medical college, Sahiwal                                                                                                         | Medical           | Public              | 37            | 3.0            |
| Department of Pharmacy, The University of Lahore                                                                                         | Pharmacy          | Public              | 55            | 4.4            |
| Faculty of Pharmacy, University of Sargodha, Sargodha                                                                                    | Pharmacy          | Public              | 68            | 5.4            |
